# Supplementary material for: The Impact of the COVID-19 Pandemic on Romanian Postgraduate Periodontal Residency Teaching: Past Experience, Present Imperatives and Future Considerations in a Multicentric Evaluation
Source: MDPI journal article supplement (doi:10.3390/ijerph19084488), 2022-04-08
Supplement: s1 [file s1]

**Table S1.** The overall distribution of residents according to age.

| Age     | PARO 1     | PARO 2     |
|---------|------------|------------|
| 26      | 6(15.79%)  | 7(11.86%)  |
| 27      | 10(26.32%) | 17(28.81%) |
| 28      | 7(18.42%)  | 12(20.34%) |
| 29      | 6(15.79%)  | 6(10.17%)  |
| 30      | 1(2.63%)   | 9(15.25%)  |
| 31-40   | 7(18.42%)  | 5(8.47%)   |
| over 40 | 0          | 3(5.08%)   |

**Table S2.** Devices used by resident doctors during online study

| Used Device              | PARO 1     | PARO 2     |
|--------------------------|------------|------------|
| Laptop                   | 18(47.37%) | 38(64.41%) |
| Laptop, Mobile phone     | 4(10.53%)  | 2(3.39%)   |
| PC                       | 2(5.26%)   | 3(5.08%)   |
| PC, Laptop, Mobile phone | 2(5.26%)   | 1(1.69%)   |
| PC, Mobile phone         | 3(7.89%)   | 1(1.69%)   |
| Tablet, Mobile phone     | 2(5.26%)   | 1(1.69%)   |
| Mobile phone             | 7(18.42%)  | 12(20.34%) |
| Laptop, Tablet           | 0          | 1(1.69%)   |

**Table S3.** Technical problems associated with the online learning.

| Technical Issues                                                           | PARO 1     | PARO 2     |
|----------------------------------------------------------------------------|------------|------------|
| Internet connection                                                        | 7(18.42%)  | 25(43.1%)  |
| Internet connection, Microphone/Webcamera                                  | 3(7.89%)   | 2(3.45%)   |
| Internet connection, No problems                                           | 1(2.63%)   |            |
| Internet connection, PC/Laptop                                             | 4(10.53%)  |            |
| Internet connection, PC/Laptop, Microphone/Webcamera                       | 1(2.63%)   |            |
| Internet connection, PC/Laptop, Microphone/Webcamera, Tablet, Mobile phone | 1(2.63%)   |            |
| Microphone/Webcamera                                                       | 2(5.26%)   | 5(8.62%)   |
| PC/ Laptop                                                                 | 3(7.89%)   | 3(5.17%)   |
| Mobile phone                                                               | 1(2.63%)   | 2(3.45%)   |
| Sound                                                                      | 1(2.63%)   |            |
| No problems                                                                | 15(39.47%) | 21(36.21%) |

**Table S4.** Significance of the differences between evaluated parameters

| <b>Question</b> | <b>t- test</b> | <b>p</b> | <b>Mean value<br/>PARO 1</b> | <b>Mean value<br/>PARO 2</b> |
|-----------------|----------------|----------|------------------------------|------------------------------|
| 4               | 1.1749         | 0.243    | 2.34                         | 2.66                         |
| 5               | 1.5415         | 0.1265   | 4.16                         | 3.8                          |
| 6               | 2.3951         | 0.0186   | 3.11                         | 2.51                         |
| 7               | -2.5149        | 0.0136   | 2.18                         | 2.86                         |
| 8               | 1.8558         | 0.0666   | 3.32                         | 2.86                         |
| 9               | 3.308          | 0.0013   | 2.76                         | 2                            |
| 10              | -2.2667        | 0.0257   | 3.16                         | 3.71                         |
| 11              | 2.411          | 0.0178   | 3.29                         | 2.64                         |
| 12              | 2.5981         | 0.0109   | 3.5                          | 2.83                         |
| 13              | 2.9945         | 0.0035   | 3.39                         | 2.59                         |
| 14              | 3.8966         | 0.0002   | 3.03                         | 2.12                         |
| 15              | 0.7147         | 0.4765   | 3.18                         | 3.39                         |
| 16              | 2.982          | 0.0036   | 3.13                         | 2.37                         |
| 17              | 2.674          | 0.0089   | 3.58                         | 2.9                          |
| 18              | 1.8886         | 0.0623   | 3.97                         | 3.47                         |
| 19              | 1.4442         | 0.152    | 4.08                         | 3.69                         |
| 20              | 0.0241         | 0.3578   | 3.84                         | 3.59                         |
| 21              | 2.6817         | 0.0086   | 3.13                         | 2.49                         |
| 22              | 2.1407         | 0.0349   | 2.89                         | 2.36                         |
| 23              | 2.5895         | 0.0111   | 3.47                         | 3                            |
| 24              | 2.1982         | 0.0304   | 3.18                         | 2.61                         |
| 25              | 0.9927         | 0.3234   | 3.46                         | 3.76                         |
| 26              | 1              | 1        | 3                            | 3                            |
| 27              | 1.9553         | 0.0538   | 2.68                         | 2.17                         |
| 28              | 0.9449         | 0.3471   | 4.05                         | 3.85                         |
| 29              | 1.4725         | 0.1442   | 3.71                         | 3.36                         |
| 30              | 3.6581         | 0.0004   | 2.58                         | 1.71                         |
| 31              | 0.1938         | 0.8468   | 4.08                         | 4.03                         |
| 32              | 0.1383         | 0.8903   | 4                            | 4.03                         |
